## CORRECTION

# Correction: Neuromesodermal progenitors are a conserved source of spinal cord with divergent growth dynamics (doi: 10.1242/dev.166728)

**Andrea Attardi, Timothy Fulton, Maria Florescu, Gopi Shah, Leila Muresan, Martin O. Lenz, Courtney Lancaster, Jan Huiskens, Alexander van Oudenaarden and Benjamin Steventon**

Light-sheet imaging data associated with *Development* (2018) **145**, dev166728 (doi: 10.1242/dev.166728) are now available in the Image Data Repository with an explanatory Data Note hosted by Wellcome Open Research.

The corrected Data availability section is shown below and both the online full-text and PDF versions have been updated.

### **Data availability (corrected)**

Sequencing data associated with the ScarTrace lineage tracing study have been deposited in GEO under accession number GSE121114. The Matlab script allowing for user-defined selection of tracking data can be found here: [doi.org/10.5281/zenodo.1475146](https://doi.org/10.5281/zenodo.1475146). Light-sheet imaging data associated with Fig. 7 have been deposited in the Image Data Repository (<https://idr.openmicroscopy.org/webclient/?show=project-552>) with an associated Data Note hosted by Wellcome Open Research (<https://wellcomeopenresearch.org/articles/3-163/v1>).

### **Data availability (original)**

Sequencing data associated with the ScarTrace lineage tracing study have been deposited in GEO under accession number GSE121114. The Matlab script allowing for user-defined selection of tracking data can be found here: [doi.org/10.5281/zenodo.1475146](https://doi.org/10.5281/zenodo.1475146).
